# Supplementary material
Source: publisher figshare collection journal article supplement (https://frontiersin.figshare.com/ndownloader/files/25952738)
Supplement: Supplementary file [file 25952738]

**Supplementary Table S1.** Overall linear mixed model analysis for *Tph2* mRNA expression using a first-order ante-dependence covariance structure by REML, selected by best -2 log likelihood criterion.

| Source                                                | Test statistic            | p-value  |
|-------------------------------------------------------|---------------------------|----------|
| Cohort                                                | $F(5, 211.906) = 31.090$  | 0.001*** |
| <i>Mycobacterium vaccae</i> NCTC 11659 ( <i>Mv</i> )  | $F(1, 258.786) = 3.665$   | 0.057    |
| Chronic disruption of rhythms (CDR)                   | $F(1, 309.394) = 23.620$  | 0.001*** |
| Acute social defeat (SD)                              | $F(1, 289.818) = 4.263$   | 0.040*   |
| Subregion                                             | $F(5, 169.079) = 26.768$  | 0.001*** |
| Rostrocaudal level                                    | $F(13, 200.949) = 25.673$ | 0.001*** |
| <i>Mv</i> × Subregion                                 | $F(5, 169.077) = 0.359$   | 0.876    |
| CDR × Subregion                                       | $F(5, 169.077) = 1.058$   | 0.385    |
| SD × Subregion                                        | $F(5, 169.076) = 0.274$   | 0.927    |
| Rostrocaudal level × Subregion                        | $F(23, 221.234) = 22.749$ | 0.001*** |
| <i>Mv</i> × CDR                                       | $F(1, 260.102) = 0.019$   | 0.889    |
| <i>Mv</i> × SD                                        | $F(1, 263.026) = 0.050$   | 0.823    |
| <i>Mv</i> × Rostrocaudal level                        | $F(13, 200.452) = 2.014$  | 0.021*   |
| CDR × SD                                              | $F(1, 280.639) = 0.194$   | 0.660    |
| CDR × Rostrocaudal level                              | $F(13, 200.561) = 3.557$  | 0.001*** |
| SD × Rostrocaudal level                               | $F(13, 200.636) = 1.452$  | 0.138    |
| <i>Mv</i> × CDR × Subregion                           | $F(5, 169.074) = 0.085$   | 0.995    |
| <i>Mv</i> × SD × Subregion                            | $F(5, 169.076) = 0.326$   | 0.897    |
| <i>Mv</i> × CDR × SD                                  | $F(1, 271.492) = 0.093$   | 0.760    |
| <i>Mv</i> × CDR × Rostrocaudal level                  | $F(13, 200.581) = 3.474$  | 0.001*** |
| CDR × SD × Rostrocaudal level                         | $F(13, 200.437) = 1.462$  | 0.134    |
| <i>Mv</i> × Subregion × Rostrocaudal level            | $F(23, 221.225) = 0.616$  | 0.916    |
| <i>Mv</i> × CDR × SD × Subregion                      | $F(10, 169.287) = 0.353$  | 0.964    |
| <i>Mv</i> × CDR × Subregion × Rostrocaudal level      | $F(46, 228.603) = 1.269$  | 0.132    |
| <i>Mv</i> × CDR × SD × Rostrocaudal level             | $F(26, 203.560) = 1.467$  | 0.075    |
| <i>Mv</i> × CDR × SD × Subregion × Rostrocaudal level | $F(92, 226.588) = 0.386$  | 1.000    |
| * $p < 0.05$ , ** $p < 0.01$ , * $p < 0.001$          |                           |          |

**Supplementary Table S2.** Subregional linear mixed model analyses for *Tph2* mRNA expression using unstructured covariance models by REML and best -2 log likelihood criteria.

| Dorsal raphe nucleus, dorsal part                    | Test statistic          | p-value  |
|------------------------------------------------------|-------------------------|----------|
| Cohort                                               | $F(5, 19.784) = 2.121$  | 0.105    |
| <i>Mycobacterium vaccae</i> NCTC 11659 ( <i>Mv</i> ) | $F(1, 42.367) = 0.54$   | 0.466    |
| Chronic disruption of rhythms (CDR)                  | $F(1, 43.394) = 6.191$  | 0.017*   |
| Acute social defeat (SD)                             | $F(1, 42.635) = 1.048$  | 0.312    |
| Rostrocaudal level                                   | $F(7, 38.479) = 12.869$ | 0.001*** |
| <i>Mv</i> × CDR                                      | $F(1, 42.426) = 0.036$  | 0.851    |
| <i>Mv</i> × SD                                       | $F(1, 42.412) = 0.001$  | 0.982    |
| <i>Mv</i> × Rostrocaudal level                       | $F(7, 38.475) = 1.068$  | 0.402    |
| CDR × SD                                             | $F(1, 42.609) = 0.025$  | 0.876    |

|                                                                                    |                         |          |
|------------------------------------------------------------------------------------|-------------------------|----------|
| CDR × Rostrocaudal level                                                           | $F(7, 38.445) = 1.883$  | 0.099    |
| SD × Rostrocaudal level                                                            | $F(7, 38.466) = 1.090$  | 0.389    |
| $M_V \times \text{CDR} \times \text{SD}$                                           | $F(1, 42.730) = 0.643$  | 0.427    |
| CDR × SD × Rostrocaudal level                                                      | $F(7, 38.460) = 0.387$  | 0.904    |
| $M_V \times \text{CDR} \times \text{Rostrocaudal level}$                           | $F(7, 38.492) = 1.297$  | 0.278    |
| $M_V \times \text{CDR} \times \text{SD} \times \text{Rostrocaudal level}$          | $F(14, 38.396) = 1.469$ | 0.170    |
| <b>Dorsal raphe nucleus, ventral part</b>                                          |                         |          |
| Cohort                                                                             | $F(5, 23.731) = 1.684$  | 0.177    |
| <i>Mycobacterium vaccae</i> NCTC 11659 ( $M_V$ )                                   | $F(1, 42.634) = 0.594$  | 0.445    |
| Chronic disruption of rhythms (CDR)                                                | $F(1, 43.397) = 5.7$    | 0.021*   |
| Acute social defeat (SD)                                                           | $F(1, 42.844) = 1.413$  | 0.241    |
| Rostrocaudal level                                                                 | $F(6, 37.567) = 18.784$ | 0.001*** |
| $M_V \times \text{CDR}$                                                            | $F(1, 42.629) = 0.060$  | 0.808    |
| $M_V \times \text{SD}$                                                             | $F(1, 42.634) = 0.013$  | 0.910    |
| $M_V \times \text{Rostrocaudal level}$                                             | $F(6, 37.571) = 1.262$  | 0.298    |
| CDR × SD                                                                           | $F(1, 42.863) = 0.017$  | 0.896    |
| CDR × Rostrocaudal level                                                           | $F(6, 37.553) = 1.294$  | 0.284    |
| SD × Rostrocaudal level                                                            | $F(6, 37.553) = 1.431$  | 0.229    |
| $M_V \times \text{CDR} \times \text{SD}$                                           | $F(1, 42.781) = 0.392$  | 0.535    |
| CDR × SD × Rostrocaudal level                                                      | $F(6, 37.570) = 0.748$  | 0.615    |
| $M_V \times \text{CDR} \times \text{Rostrocaudal level}$                           | $F(6, 37.557) = 3.022$  | 0.016*   |
| $M_V \times \text{CDR} \times \text{SD} \times \text{Rostrocaudal level}$          | $F(12, 37.541) = 1.573$ | 0.142    |
| <b>Dorsal raphe nucleus, ventrolateral part/ Ventrolateral periaqueductal grey</b> |                         |          |
| Cohort                                                                             | $F(5, 43.017) = 5.736$  | 0.001*** |
| <i>Mycobacterium vaccae</i> NCTC 11659 ( $M_V$ )                                   | $F(1, 39.746) = 1.813$  | 0.186    |
| Chronic disruption of rhythms (CDR)                                                | $F(1, 44.11) = 5.425$   | 0.024*   |
| Acute social defeat (SD)                                                           | $F(1, 41.083) = 0.435$  | 0.513    |
| Rostrocaudal level                                                                 | $F(3, 44.673) = 3.650$  | 0.019*   |
| $M_V \times \text{CDR}$                                                            | $F(1, 39.98) = 0.131$   | 0.719    |
| $M_V \times \text{SD}$                                                             | $F(1, 40.431) = 0.529$  | 0.471    |
| $M_V \times \text{Rostrocaudal level}$                                             | $F(3, 44.663) = 1.855$  | 0.151    |
| CDR × SD                                                                           | $F(1, 41.118) = 0.020$  | 0.889    |
| CDR × Rostrocaudal level                                                           | $F(3, 44.713) = 0.340$  | 0.797    |
| SD × Rostrocaudal level                                                            | $F(3, 44.662) = 1.198$  | 0.321    |
| $M_V \times \text{CDR} \times \text{SD}$                                           | $F(1, 41.181) = 0.188$  | 0.667    |
| CDR × SD × Rostrocaudal level                                                      | $F(3, 44.665) = 0.178$  | 0.911    |
| $M_V \times \text{CDR} \times \text{Rostrocaudal level}$                           | $F(3, 44.704) = 0.391$  | 0.760    |
| $M_V \times \text{CDR} \times \text{SD} \times \text{Rostrocaudal level}$          | $F(6, 44.362) = 1.463$  | 0.213    |
| <b>Dorsal raphe nucleus, caudal part</b>                                           |                         |          |
| Cohort                                                                             | $F(5, 30.659) = 3.893$  | 0.008**  |
| <i>Mycobacterium vaccae</i> NCTC 11659 ( $M_V$ )                                   | $F(1, 34.889) = 2.115$  | 0.155    |
| Chronic disruption of rhythms (CDR)                                                | $F(1, 38.005) = 6.502$  | 0.015*   |
| Acute social defeat (SD)                                                           | $F(1, 35.983) = 0.224$  | 0.639    |

|                                                                           |                         |          |
|---------------------------------------------------------------------------|-------------------------|----------|
| Rostrocaudal level                                                        | $F(5, 27.88) = 52.541$  | 0.001*** |
| $M_V \times \text{CDR}$                                                   | $F(1, 34.554) = 0.328$  | 0.571    |
| $M_V \times \text{SD}$                                                    | $F(1, 35.305) = 0.008$  | 0.931    |
| $M_V \times \text{Rostrocaudal level}$                                    | $F(5, 27.868) = 2.671$  | 0.043*   |
| $\text{CDR} \times \text{SD}$                                             | $F(1, 36.132) = 1.473$  | 0.233    |
| $\text{CDR} \times \text{Rostrocaudal level}$                             | $F(5, 27.887) = 3.816$  | 0.009**  |
| $\text{SD} \times \text{Rostrocaudal level}$                              | $F(5, 27.895) = 0.506$  | 0.769    |
| $M_V \times \text{CDR} \times \text{SD}$                                  | $F(1, 36.077) = 0.730$  | 0.399    |
| $\text{CDR} \times \text{SD} \times \text{Rostrocaudal level}$            | $F(5, 27.903) = 2.069$  | 0.100    |
| $M_V \times \text{CDR} \times \text{Rostrocaudal level}$                  | $F(5, 27.878) = 3.279$  | 0.019*   |
| $M_V \times \text{CDR} \times \text{SD} \times \text{Rostrocaudal level}$ | $F(10, 27.900) = 0.820$ | 0.613    |
| <b>Dorsal raphe nucleus, interfascicular part</b>                         |                         |          |
| Cohort                                                                    | $F(5, 37.701) = 11.198$ | 0.001*** |
| <i>Mycobacterium vaccae</i> NCTC 11659 ( $M_V$ )                          | $F(1, 37.738) = 1.038$  | 0.315    |
| Chronic disruption of rhythms (CDR)                                       | $F(1, 44.437) = 9.975$  | 0.003**  |
| Acute social defeat (SD)                                                  | $F(1, 38.795) = 1.323$  | 0.257    |
| Rostrocaudal level                                                        | $F(8, 32.831) = 12.876$ | 0.001*** |
| $M_V \times \text{CDR}$                                                   | $F(1, 37.880) = 0.167$  | 0.685    |
| $M_V \times \text{SD}$                                                    | $F(1, 38.778) = 0.628$  | 0.433    |
| $M_V \times \text{Rostrocaudal level}$                                    | $F(8, 32.822) = 0.533$  | 0.823    |
| $\text{CDR} \times \text{SD}$                                             | $F(1, 38.836) = 0.068$  | 0.795    |
| $\text{CDR} \times \text{Rostrocaudal level}$                             | $F(8, 32.751) = 3.110$  | 0.010*   |
| $\text{SD} \times \text{Rostrocaudal level}$                              | $F(8, 32.678) = 1.048$  | 0.422    |
| $M_V \times \text{CDR} \times \text{SD}$                                  | $F(1, 39.377) = 0.115$  | 0.736    |
| $\text{CDR} \times \text{SD} \times \text{Rostrocaudal level}$            | $F(8, 32.742) = 1.535$  | 0.183    |
| $M_V \times \text{CDR} \times \text{Rostrocaudal level}$                  | $F(8, 32.837) = 2.782$  | 0.018*   |
| $M_V \times \text{CDR} \times \text{SD} \times \text{Rostrocaudal level}$ | $F(16, 32.310) = 0.944$ | 0.533    |
| <b>Median raphe nucleus</b>                                               |                         |          |
| Cohort                                                                    | $F(5, 39.975) = 3.024$  | 0.021*   |
| <i>Mycobacterium vaccae</i> NCTC 11659 ( $M_V$ )                          | $F(1, 24.542) = 0.114$  | 0.739    |
| Chronic disruption of rhythms (CDR)                                       | $F(1, 25.475) = 1.736$  | 0.199    |
| Acute social defeat (SD)                                                  | $F(1, 24.829) = 0.836$  | 0.369    |
| Rostrocaudal level                                                        | $F(7, 31.870) = 11.334$ | 0.001*** |
| $M_V \times \text{CDR}$                                                   | $F(1, 24.677) = 0.058$  | 0.811    |
| $M_V \times \text{SD}$                                                    | $F(1, 24.705) = 0.798$  | 0.380    |
| $M_V \times \text{Rostrocaudal level}$                                    | $F(7, 31.974) = 1.613$  | 0.168    |
| $\text{CDR} \times \text{SD}$                                             | $F(1, 24.848) = 1.731$  | 0.200    |
| $\text{CDR} \times \text{Rostrocaudal level}$                             | $F(7, 31.946) = 0.947$  | 0.485    |
| $\text{SD} \times \text{Rostrocaudal level}$                              | $F(7, 31.991) = 1.204$  | 0.329    |
| $M_V \times \text{CDR} \times \text{SD}$                                  | $F(1, 24.900) = 1.035$  | 0.319    |
| $\text{CDR} \times \text{SD} \times \text{Rostrocaudal level}$            | $F(7, 31.969) = 1.672$  | 0.152    |
| $M_V \times \text{CDR} \times \text{Rostrocaudal level}$                  | $F(7, 32.003) = 0.973$  | 0.467    |
| $M_V \times \text{CDR} \times \text{SD} \times \text{Rostrocaudal level}$ | $F(14, 31.232) = 0.458$ | 0.939    |

\* $p < 0.05$ , \*\* $p < 0.01$ , \* $p < 0.001$

**Supplementary Table S3.** Overall linear mixed model analysis for *Slc6a4* mRNA expression using a first-order ante-dependence covariance structure by REML, selected by best -2 log likelihood criterion.

| Source                                                | Test statistic            | p-value |
|-------------------------------------------------------|---------------------------|---------|
| Cohort                                                | $F(5, 119.812) = 20.467$  | .000*** |
| <i>Mycobacterium vaccae</i> NCTC 11659 ( <i>Mv</i> )  | $F(1, 286.887) = 2.513$   | .114    |
| Chronic disruption of rhythms (CDR)                   | $F(1, 356.592) = 45.539$  | .000*** |
| Acute social defeat (SD)                              | $F(1, 327.888) = 1.984$   | .160    |
| Subregion                                             | $F(5, 156.763) = 32.663$  | .001*** |
| Rostrocaudal level                                    | $F(13, 213.074) = 46.419$ | .001*** |
| <i>Mv</i> × Subregion                                 | $F(5, 156.766) = 0.322$   | .899    |
| CDR × Subregion                                       | $F(5, 156.764) = 1.461$   | .206    |
| SD × Subregion                                        | $F(5, 156.763) = 0.198$   | .963    |
| Rostrocaudal level × Subregion                        | $F(23, 268.966) = 30.625$ | .001*** |
| <i>Mv</i> × CDR                                       | $F(1, 289.011) = 0.290$   | .591    |
| <i>Mv</i> × SD                                        | $F(1, 286.801) = 5.369$   | .021*   |
| <i>Mv</i> × Rostrocaudal level                        | $F(13, 212.975) = 2.256$  | .009**  |
| CDR × SD                                              | $F(1, 313.071) = 4.867$   | .028*   |
| CDR × Rostrocaudal level                              | $F(13, 212.922) = 4.854$  | .001*** |
| SD × Rostrocaudal level                               | $F(13, 212.603) = 1.398$  | .162    |
| <i>Mv</i> × CDR × Subregion                           | $F(5, 156.766) = 0.104$   | .991    |
| <i>Mv</i> × SD × Subregion                            | $F(5, 156.765) = 0.291$   | .917    |
| <i>Mv</i> × CDR × SD                                  | $F(1, 299.027) = 7.710$   | .006**  |
| <i>Mv</i> × CDR × Rostrocaudal level                  | $F(13, 212.832) = 1.490$  | .123    |
| CDR × SD × Rostrocaudal level                         | $F(13, 212.683) = 1.902$  | .031*   |
| <i>Mv</i> × Subregion × Rostrocaudal level            | $F(23, 268.963) = 0.590$  | .934    |
| <i>Mv</i> × CDR × SD × Subregion                      | $F(10, 157.013) = 0.195$  | .996    |
| <i>Mv</i> × CDR × Subregion × Rostrocaudal level      | $F(46, 268.202) = 1.345$  | .079    |
| <i>Mv</i> × CDR × SD × Rostrocaudal level             | $F(26, 212.473) = 2.061$  | .003**  |
| <i>Mv</i> × CDR × SD × Subregion × Rostrocaudal level | $F(92, 265.55) = 0.721$   | .966    |
| * $p < 0.05$ , ** $p < 0.01$ , * $p < 0.001$          |                           |         |

**Supplementary Table S4.** Subregional linear mixed model analyses for *Slc6a4* mRNA expression using unstructured covariance models by REML and best -2 log likelihood criteria.

| Dorsal raphe nucleus, dorsal part                    | Test statistic          | p-value  |
|------------------------------------------------------|-------------------------|----------|
| Cohort                                               | $F(5, 27.194) = 2.477$  | 0.057    |
| <i>Mycobacterium vaccae</i> NCTC 11659 ( <i>Mv</i> ) | $F(1, 43.808) = 0.526$  | 0.472    |
| Chronic disruption of rhythms (CDR)                  | $F(1, 45.978) = 13.306$ | 0.001*** |
| Acute social defeat (SD)                             | $F(1, 44.112) = 0.421$  | 0.520    |
| Rostrocaudal level                                   | $F(7, 40.513) = 33.702$ | 0.001*** |
| <i>Mv</i> × CDR                                      | $F(1, 43.878) = 0.001$  | 0.981    |
| <i>Mv</i> × SD                                       | $F(1, 43.862) = 0.923$  | 0.342    |

|                                                                                    |                         |          |
|------------------------------------------------------------------------------------|-------------------------|----------|
| $M_V \times$ Rostrocaudal level                                                    | $F(7, 40.363) = 1.992$  | 0.080    |
| CDR $\times$ SD                                                                    | $F(1, 44.036) = 0.917$  | 0.344    |
| CDR $\times$ Rostrocaudal level                                                    | $F(7, 40.459) = 5.477$  | 0.001*** |
| SD $\times$ Rostrocaudal level                                                     | $F(7, 40.340) = 1.219$  | 0.315    |
| $M_V \times$ CDR $\times$ SD                                                       | $F(1, 44.489) = 0.128$  | 0.722    |
| CDR $\times$ SD $\times$ Rostrocaudal level                                        | $F(7, 40.332) = 0.525$  | 0.810    |
| $M_V \times$ CDR $\times$ Rostrocaudal level                                       | $F(7, 40.408) = 0.321$  | 0.940    |
| $M_V \times$ CDR $\times$ SD $\times$ Rostrocaudal level                           | $F(14, 40.529) = 0.898$ | 0.567    |
| <b>Dorsal raphe nucleus, ventral part</b>                                          |                         |          |
| Cohort                                                                             | $F(5, 28.039) = 2.711$  | 0.040*   |
| <i>Mycobacterium vaccae</i> NCTC 11659 ( $M_V$ )                                   | $F(1, 45.882) = 0.51$   | 0.479    |
| Chronic disruption of rhythms (CDR)                                                | $F(1, 46.823) = 9.29$   | 0.004**  |
| Acute social defeat (SD)                                                           | $F(1, 46.054) = 0.533$  | 0.469    |
| Rostrocaudal level                                                                 | $F(6, 40.270) = 34.237$ | 0.001*** |
| $M_V \times$ CDR                                                                   | $F(1, 45.924) = 0.004$  | 0.951    |
| $M_V \times$ SD                                                                    | $F(1, 45.897) = 0.851$  | 0.361    |
| $M_V \times$ Rostrocaudal level                                                    | $F(6, 40.253) = 0.884$  | 0.515    |
| CDR $\times$ SD                                                                    | $F(1, 45.988) = 0.376$  | 0.543    |
| CDR $\times$ Rostrocaudal level                                                    | $F(6, 40.253) = 3.378$  | 0.009**  |
| SD $\times$ Rostrocaudal level                                                     | $F(6, 40.227) = 1.552$  | 0.186    |
| $M_V \times$ CDR $\times$ SD                                                       | $F(1, 46.171) = 0.294$  | 0.590    |
| CDR $\times$ SD $\times$ Rostrocaudal level                                        | $F(6, 40.252) = 0.856$  | 0.535    |
| $M_V \times$ CDR $\times$ Rostrocaudal level                                       | $F(6, 40.230) = 0.573$  | 0.749    |
| $M_V \times$ CDR $\times$ SD $\times$ Rostrocaudal level                           | $F(12, 40.256) = 1.322$ | 0.244    |
| <b>Dorsal raphe nucleus, ventrolateral part/ Ventrolateral periaqueductal grey</b> |                         |          |
| Cohort                                                                             | $F(5, 42.157) = 13.173$ | 0.001*** |
| <i>Mycobacterium vaccae</i> NCTC 11659 ( $M_V$ )                                   | $F(1, 46.626) = 0.396$  | 0.532    |
| Chronic disruption of rhythms (CDR)                                                | $F(1, 51.324) = 3.998$  | 0.051    |
| Acute social defeat (SD)                                                           | $F(1, 47.330) = 0.182$  | 0.672    |
| Rostrocaudal level                                                                 | $F(3, 47.492) = 5.661$  | 0.002**  |
| $M_V \times$ CDR                                                                   | $F(1, 46.775) = 1.440$  | 0.236    |
| $M_V \times$ SD                                                                    | $F(1, 47.047) = 0.184$  | 0.670    |
| $M_V \times$ Rostrocaudal level                                                    | $F(3, 47.475) = 0.808$  | 0.496    |
| CDR $\times$ SD                                                                    | $F(1, 47.286) = 0.137$  | 0.713    |
| CDR $\times$ Rostrocaudal level                                                    | $F(3, 47.357) = 0.160$  | 0.923    |
| SD $\times$ Rostrocaudal level                                                     | $F(3, 47.399) = 0.368$  | 0.776    |
| $M_V \times$ CDR $\times$ SD                                                       | $F(1, 48.036) = 0.052$  | 0.821    |
| CDR $\times$ SD $\times$ Rostrocaudal level                                        | $F(3, 47.403) = 0.790$  | 0.505    |
| $M_V \times$ CDR $\times$ Rostrocaudal level                                       | $F(3, 47.429) = 0.799$  | 0.501    |
| $M_V \times$ CDR $\times$ SD $\times$ Rostrocaudal level                           | $F(6, 47.529) = 0.708$  | 0.645    |
| <b>Dorsal raphe nucleus, caudal part</b>                                           |                         |          |
| Cohort                                                                             | $F(5, 24.962) = 10.162$ | 0.001*** |
| <i>Mycobacterium vaccae</i> NCTC 11659 ( $M_V$ )                                   | $F(1, 43.422) = 0.919$  | 0.343    |

|                                                     |                         |          |
|-----------------------------------------------------|-------------------------|----------|
| Chronic disruption of rhythms (CDR)                 | $F(1, 45.568) = 7.038$  | 0.011*   |
| Acute social defeat (SD)                            | $F(1, 43.419) = 0.168$  | 0.684    |
| Rostrocaudal level                                  | $F(5, 39.587) = 20.033$ | 0.001*** |
| $Mv \times CDR$                                     | $F(1, 43.402) = 1.896$  | 0.176    |
| $Mv \times SD$                                      | $F(1, 43.495) = 2.432$  | 0.126    |
| $Mv \times$ Rostrocaudal level                      | $F(5, 39.756) = 1.693$  | 0.159    |
| CDR $\times$ SD                                     | $F(1, 43.437) = 0.590$  | 0.447    |
| CDR $\times$ Rostrocaudal level                     | $F(5, 39.705) = 2.223$  | 0.071    |
| SD $\times$ Rostrocaudal level                      | $F(5, 39.468) = 0.602$  | 0.699    |
| $Mv \times CDR \times SD$                           | $F(1, 43.669) = 5.705$  | 0.021*   |
| CDR $\times$ SD $\times$ Rostrocaudal level         | $F(5, 39.520) = 1.300$  | 0.283    |
| $Mv \times CDR \times$ Rostrocaudal level           | $F(5, 39.722) = 2.117$  | 0.083    |
| $Mv \times CDR \times SD \times$ Rostrocaudal level | $F(10, 39.399) = 1.881$ | 0.078    |
| <b>Dorsal raphe nucleus, interfascicular part</b>   |                         |          |
| Cohort                                              | $F(5, 39.994) = 4.533$  | 0.002**  |
| <i>Mycobacterium vaccae</i> NCTC 11659 ( $Mv$ )     | $F(1, 34.006) = 0.309$  | 0.582    |
| Chronic disruption of rhythms (CDR)                 | $F(1, 37.093) = 7.705$  | 0.009**  |
| Acute social defeat (SD)                            | $F(1, 34.167) = 0.447$  | 0.508    |
| Rostrocaudal level                                  | $F(8, 37.499) = 15.442$ | 0.001*** |
| $Mv \times CDR$                                     | $F(1, 34.038) = 0.236$  | 0.630    |
| $Mv \times SD$                                      | $F(1, 34.092) = 1.75$   | 0.195    |
| $Mv \times$ Rostrocaudal level                      | $F(8, 37.563) = 1.794$  | 0.109    |
| CDR $\times$ SD                                     | $F(1, 34.250) = 0.241$  | 0.627    |
| CDR $\times$ Rostrocaudal level                     | $F(8, 37.475) = 3.038$  | 0.010*   |
| SD $\times$ Rostrocaudal level                      | $F(8, 37.430) = 2.126$  | 0.058    |
| $Mv \times CDR \times SD$                           | $F(1, 34.551) = 1.663$  | 0.206    |
| CDR $\times$ SD $\times$ Rostrocaudal level         | $F(8, 37.461) = 3.26$   | 0.006**  |
| $Mv \times CDR \times$ Rostrocaudal level           | $F(8, 37.608) = 1.237$  | 0.305    |
| $Mv \times CDR \times SD \times$ Rostrocaudal level | $F(16, 37.432) = 2.954$ | 0.003**  |
| <b>Median raphe nucleus</b>                         |                         |          |
| Cohort                                              | $F(5, 30.960) = 1.625$  | 0.183    |
| <i>Mycobacterium vaccae</i> NCTC 11659 ( $Mv$ )     | $F(1, 38.743) = 0.223$  | 0.640    |
| Chronic disruption of rhythms (CDR)                 | $F(1, 41.042) = 9.004$  | 0.005**  |
| Acute social defeat (SD)                            | $F(1, 39.010) = 0.617$  | 0.437    |
| Rostrocaudal level                                  | $F(7, 35.622) = 22.651$ | 0.001*** |
| $Mv \times CDR$                                     | $F(1, 38.833) = 0.027$  | 0.871    |
| $Mv \times SD$                                      | $F(1, 38.683) = 2.059$  | 0.159    |
| $Mv \times$ Rostrocaudal level                      | $F(7, 35.561) = 3.03$   | 0.013*   |
| CDR $\times$ SD                                     | $F(1, 39.016) = 2.468$  | 0.124    |
| CDR $\times$ Rostrocaudal level                     | $F(7, 35.546) = 1.628$  | 0.159    |
| SD $\times$ Rostrocaudal level                      | $F(7, 35.460) = 1.898$  | 0.099    |
| $Mv \times CDR \times SD$                           | $F(1, 39.320) = 0.872$  | 0.356    |
| CDR $\times$ SD $\times$ Rostrocaudal level         | $F(7, 35.507) = 0.751$  | 0.631    |

|                                                            |                         |       |
|------------------------------------------------------------|-------------------------|-------|
| $Mv \times CDR \times \text{Rostrocaudal level}$           | $F(7, 35.531) = 1.372$  | 0.247 |
| $Mv \times CDR \times SD \times \text{Rostrocaudal level}$ | $F(14, 35.378) = 1.888$ | 0.063 |
| $*p < 0.05, **p < 0.01, *p < 0.001$                        |                         |       |

**Supplementary File S1.** Data inclusion criteria table listing data used for analysis throughout 2015–2017 and calculated  $n$  values for each analysis.
